# Supplementary material
Source: PubMed Central journal article supplement (PMC6366563)
Supplement: NIHMS79265-supplement-Supplementary_Table_2_and_5.pdf [file NIHMS79265-supplement-Supplementary_Table_2_and_5.pdf]

**SUPP-Table 2: Vitamin C intake from food and supplement sources by supplement user subgroups and the prevalence of meeting/exceeding of dietary reference values using UK-weighted NDNS data from the rolling programme years 1-4<sup>(26)</sup>.**

| Sex   | Age (y) | Supplement status | N base | Food Vitamin C (mg/d)<br>Median (IQR) | < EAR 25 mg (%) | >1000 mg/d (%)* | TNI Vitamin C (mg/d)<br>Median (IQR) | < EAR 25 mg (%) | >1000 mg/d (%)* |
|-------|---------|-------------------|--------|---------------------------------------|-----------------|-----------------|--------------------------------------|-----------------|-----------------|
| Men   | 19-64   | ALL               | 1126   | 71 (41, 109)                          | 10.6            | 0               | 74 (44, 116)                         | 9.5             | 0.4             |
|       |         | NSU               | 925    | 69 (41, 105)                          | 10.7            | 0               | 69 (41, 105)                         | 10.7            | 0               |
|       |         | SU                | 201    | 82 (42, 133)                          | 9.9             | 0               | 123 (75, 194)                        | 3.9             | 2.5             |
|       |         | SU-C              | 91     | 83 (42, 148)                          | 8.4             | 0               | 83 (42, 148)                         | 8.4             | 0               |
|       |         | SU+C              | 110    | 77 (42, 117)                          | 11.7            | 0               | 173 (105, 278)                       | 0               | 4.6             |
|       | 65+     | ALL               | 317    | 75 (43, 114)                          | 9.3             | 0               | 79 (44, 120)                         | 9.3             | 0.1             |
|       |         | NSU               | 211    | 65 (39, 104)                          | 12.8            | 0               | 65 (39, 104)                         | 12.8            | 0               |
|       |         | SU                | 106    | 88 (55, 119)                          | 2.9             | 0               | 115 (69, 157)                        | 2.3             | 0.6             |
|       |         | SU-C              | 73     | 87 (54, 116)                          | 3.4             | 0               | 87 (54, 116)                         | 3.4             | 0               |
|       |         | SU+C              | 33     | 107 (55, 130)                         | 0               | 0               | 174 (130, 263)                       | 0               | 1.8             |
| Women | 19-64   | ALL               | 1571   | 68 (42, 104)                          | 8.3             | 0               | 77 (44, 120)                         | 7.6             | 1.1             |
|       |         | NSU               | 1148   | 62 (40, 99)                           | 9.5             | 0               | 62 (40, 99)                          | 9.5             | 0               |
|       |         | SU                | 423    | 83 (49, 118)                          | 5.0             | 0               | 129 (82, 206)                        | 2.6             | 4.1             |
|       |         | SU-C              | 207    | 86 (51, 128)                          | 5.5             | 0               | 86 (51, 128)                         | 5.5             | 0               |
|       |         | SU+C              | 216    | 76 (46, 117)                          | 4.6             | 0               | 181 (124, 365)                       | 0               | 7.8             |
|       | 65+     | ALL               | 436    | 78 (47, 115)                          | 3.9             | 0               | 84 (50, 125)                         | 3.8             | 0.8             |
|       |         | NSU               | 251    | 69 (43, 106)                          | 6.4             | 0               | 69 (43, 106)                         | 6.4             | 0               |
|       |         | SU                | 185    | 82 (51, 122)                          | 1.0             | 0               | 102 (66, 150)                        | 0.7             | 1.7             |
|       |         | SU-C              | 118    | 81 (51, 119)                          | 1.1             | 0               | 81 (51, 119)                         | 1.1             | 0               |
|       |         | SU+C              | 67     | 84 (50, 125)                          | 0.9             | 0               | 154 (110, 282)                       | 0               | 4.4             |

TNI, total nutrient intake (food + supplement); NSU, non-supplement users; SU, supplement users; SU+C, supplement user consumes a vitamin C containing supplement; SU-C, supplement user consumes a supplement without vitamin C; EAR, estimated average requirement; NDNS, national diet and nutrition survey; IQR, interquartile range.

\* No SUL or GL are set by the EVM, but intakes >1000 mg have been associated with GI-problems in certain populations<sup>(36)</sup>. This cutoff value was taken as an illustration of high intakes.

The inclusion of an additional stratification among the SU (SU-C and SU+C, rather than the combined group of SU) might have made the median, IQR and prevalence estimates unstable.

**SUPP - Table 5: EPA/DHA intake from food and supplement sources by supplement user subgroups and the prevalence of meeting/exceeding the EAR using baseline 7dDD data (>= 3 completed days) from the EPIC-Norfolk study (1993-1998) – re-analysed data by age/sex groups as used in Lentjes *et al.* 2015 and 2017 <sup>(59,106)</sup>.**

| Sex   | Age (y) | Supplement status | N    | Median (IQR) Food EPA+DHA (g/d) | DRVs using food sources |         | Median (IQR) TNI EPA+DHA (g/d) | DRVs using TNI |         | Meeting 0.25 (g/d)** |     |   |
|-------|---------|-------------------|------|---------------------------------|-------------------------|---------|--------------------------------|----------------|---------|----------------------|-----|---|
|       |         |                   |      |                                 | <EAR 0.45 g/d           | >5 g/d* |                                | <EAR 0.45 g/d  | >5 g/d* | Food                 | TNI |   |
|       |         |                   |      |                                 | %                       | N       |                                |                |         |                      |     |   |
|       |         |                   |      |                                 |                         |         | %                              | N              |         |                      | %   | % |
| Men   | 39-64   | ALL               | 6675 | 0.13 (0.07, 0.35)               | 80                      | 0       | 0.16 (0.08, 0.41)              | 77             | 1       | 67                   | 63  |   |
|       |         | NSU               | 4712 | 0.12 (0.06, 0.32)               | 82                      | 0       | 0.12 (0.06, 0.32)              | 82             | 0       | 69                   | 69  |   |
|       |         | SU                | 1963 | 0.16 (0.07, 0.42)               | 77                      | 0       | 0.27 (0.14, 0.64)              | 66             | 1       | 63                   | 48  |   |
|       |         | SU-EPA/DHA        | 683  | 0.16 (0.07, 0.41)               | 78                      | 0       | 0.16 (0.07, 0.41)              | 78             | 0       | 62                   | 62  |   |
|       |         | SU+EPA/DHA        | 1280 | 0.15 (0.07, 0.43)               | 77                      | 0       | 0.31 (0.18, 0.81)              | 59             | 1       | 63                   | 40  |   |
|       | 65+     | ALL               | 3545 | 0.16 (0.07, 0.40)               | 78                      | 0       | 0.21 (0.09, 0.50)              | 73             | 0       | 62                   | 56  |   |
|       |         | NSU               | 2260 | 0.15 (0.07, 0.38)               | 80                      | 0       | 0.15 (0.07, 0.38)              | 80             | 0       | 65                   | 65  |   |
|       |         | SU                | 1285 | 0.18 (0.08, 0.45)               | 75                      | 0       | 0.32 (0.16, 0.77)              | 60             | 0       | 58                   | 41  |   |
|       |         | SU-EPA/DHA        | 352  | 0.20 (0.07, 0.46)               | 75                      | 0       | 0.20 (0.07, 0.46)              | 75             | 0       | 57                   | 57  |   |
|       |         | SU+EPA/DHA        | 933  | 0.18 (0.08, 0.45)               | 75                      | 0       | 0.38 (0.19, 0.92)              | 55             | 0       | 59                   | 35  |   |
| Women | 39-64   | ALL               | 8776 | 0.11 (0.05, 0.30)               | 84                      | 0       | 0.15 (0.07, 0.36)              | 80             | 0       | 71                   | 66  |   |
|       |         | NSU               | 4822 | 0.10 (0.05, 0.27)               | 86                      | 0       | 0.10 (0.05, 0.27)              | 86             | 0       | 73                   | 73  |   |
|       |         | SU                | 3954 | 0.12 (0.06, 0.35)               | 82                      | 0       | 0.20 (0.10, 0.48)              | 73             | 0       | 68                   | 57  |   |
|       |         | SU-EPA/DHA        | 1767 | 0.11 (0.05, 0.32)               | 83                      | 0       | 0.11 (0.05, 0.32)              | 83             | 0       | 70                   | 70  |   |
|       |         | SU+EPA/DHA        | 2187 | 0.12 (0.06, 0.36)               | 81                      | 0       | 0.27 (0.16, 0.62)              | 66             | 0       | 66                   | 47  |   |
|       | 65+     | ALL               | 3960 | 0.14 (0.06, 0.36)               | 82                      | 0       | 0.19 (0.08, 0.42)              | 77             | 1       | 65                   | 59  |   |
|       |         | NSU               | 2192 | 0.13 (0.06, 0.34)               | 83                      | 0       | 0.13 (0.06, 0.34)              | 83             | 0       | 67                   | 67  |   |
|       |         | SU                | 1768 | 0.15 (0.07, 0.37)               | 81                      | 0       | 0.25 (0.14, 0.56)              | 69             | 1       | 64                   | 50  |   |
|       |         | SU-EPA/DHA        | 575  | 0.16 (0.06, 0.37)               | 81                      | 0       | 0.16 (0.06, 0.37)              | 81             | 0       | 62                   | 62  |   |
|       |         | SU+EPA/DHA        | 1193 | 0.15 (0.07, 0.37)               | 81                      | 0       | 0.31 (0.17, 0.71)              | 63             | 1       | 64                   | 44  |   |

TNI, total nutrient intake (food + supplement); EPA, eicosapentaenoic acid; DHA, docosahexaenoic acid; NSU, non-supplement users; SU, supplement users; SU+EPA/DHA, supplement user consumes a EPA/DHA containing supplement (mostly cod liver oil and fish oil supplements); SU-EPA/DHA, supplement user consumes a supplement without EPA/DHA; DRV, daily reference value; EAR, estimated average requirement; IQR, interquartile range.

\* Amounts > 5 g/d have been associated with adverse events, but EFSA has not set a TUL for EPA+DHA <sup>(111)</sup>.

\*\* Amounts of >0.25 g/d have been associated with anti-arrhythmic effects <sup>(105)</sup>.
